# Supplementary material for: Free energy pathways of a multistable liquid crystal device
Source: Royal Society of Chemistry journal article supplement (doi:10.1039/c5sm00578g), 2015-01-01
Supplement: c5sm00578g1.pdf [file c5sm00578g1.pdf]

***List of supplementary movies:***

1. strong\_neg.mpg – see also Fig. 3(a-c).  
Transition pathway between a rotated and a diagonal state in the strong anchoring regime, as mediated by a  $-1/2$  defect.
2. strong\_pos.mpg – see also Fig. 3(d-f).  
Transition pathway between a rotated and a diagonal state in the strong anchoring regime, as mediated by a  $+1/2$  defect.
3. strong\_posneg.mpg – see also Fig. 3(g-i).  
Transition pathway between a rotated and a diagonal state in the strong anchoring regime, as mediated by a pair of  $+1/2$  and  $-1/2$  defects.
4. moderate\_seq1.mpg – see also Fig. 6(a-c).  
Transition pathway between a rotated and a diagonal state in the moderate anchoring regime, as mediated by “sequential” breaking of the surface anchoring along an edge.
5. moderate\_seq2.mpg – see also Fig. 6(d-f).  
Transition pathway between a rotated and a diagonal state in the moderate anchoring regime, as mediated by “sequential” breaking of the surface anchoring along an edge.
6. moderate\_global.mpg – see also Fig. 7.  
Transition pathway between a rotated and a diagonal state in the moderate anchoring regime, as mediated by “global” breaking of the surface anchoring along an edge.
7. weak.mpg – see also Fig. 8.  
Transition pathway between two diagonal states in the weak anchoring regime.
